# Supplementary material for: Acupuncture Intervention Protocol: Consensus Process for a Pragmatic Randomized Controlled Trial of Acupuncture for Management of Chronic Low Back Pain in Older Adults: An NIH HEAL Initiative Funded Project
Source: PubMed Central journal article supplement — Glob Adv Health Med. 2021 May 26;10:21649561211007091. doi: 10.1177/21649561211007091 (PMC8161858; doi:10.1177/21649561211007091), 2021-05-26
Supplement: sj-pdf-2-gam-10.1177_21649561211007091.pdf [file sj-pdf-2-gam-10.1177_21649561211007091.pdf]

Study ID: \_\_\_\_\_

Visit Date: \_\_\_\_\_/\_\_\_\_\_/202\_\_

Visit No (check Box) 1  2  3  4  5  6

Visit Start Time: \_\_\_\_:\_\_\_\_ Visit End Time: \_\_\_\_:\_\_\_\_

Notes for Provider:

How is your pain today on a scale of 0-10? \_\_\_\_\_

Were there any adverse events from the last treatment:  No  Yes, explain: \_\_\_\_\_

Please check all the elements that were part of this treatment:

Asking Interview  ROM observation  Palpation of region, channels, Hara

Points Needed: (use Grid below)

**GO TO ACUPUNCTURE POINT INSERTION GRAPHIC BELOW (END OF DOC)**

Number of Needles Used: \_\_\_\_\_ Local Points:  No  Yes Distal Points:  No  Yes

Needle Retention Time (minutes): Minimum: \_\_\_\_\_ Maximum: \_\_\_\_\_ Average: \_\_\_\_\_

De qi:  No  Some  Most/All Needle Length(s): \_\_\_\_\_

Please check all the elements that were part of the end of this treatment:

Resting after needles removed  Assess pain and ROM, patient's readiness to leave  Confirmation of next appt

What is the status of this patient (please check the most appropriate box):

1.  Continuing LBP focused treatment;
2.  LBP problems improved, expanded focus to potentially contributing factors to enhance sustained outcomes (please describe: \_\_\_\_\_)
3.  LBP and potentially contributing factors largely resolved, focus on maintenance of effect
4.  Patient has completed treatment
5.  treatment unlikely to be effective for this individual (acupuncture nonrespondent), don't recommend continuing

Is there anything that this study has restricted you from doing that you would have wanted to do? (Check all that apply)

- |                                             |                                                 |
|---------------------------------------------|-------------------------------------------------|
| <input type="checkbox"/> Moxibustion        | <input type="checkbox"/> Guasha                 |
| <input type="checkbox"/> Other heat         | <input type="checkbox"/> Tuina                  |
| <input type="checkbox"/> Electroacupuncture | <input type="checkbox"/> Herbs                  |
| <input type="checkbox"/> Cupping            | <input type="checkbox"/> Other (specify): _____ |

**Self care recommendations (check all that apply):**

- None
- Movement, activity, exercise
- Meditative movement (QiGong, Tai Chi, Yoga)
- Food/diet/water: general
- Guidance on breathing awareness
- Other (specify): \_\_\_\_\_

**Did you use ear seeds?**  No  Yes

**Was this session abbreviated because of lack of time:**  No  Yes

**Were there any adverse events during this treatment:**  No  Yes, explain: \_\_\_\_\_

|                                                                                |                            |
|--------------------------------------------------------------------------------|----------------------------|
| COMPLETE THESE AT FIRST VISIT ONLY                                             | Needle Gauge(s) (mm) _____ |
| Needles are: <input type="checkbox"/> Coated <input type="checkbox"/> Uncoated | Needle Manufacturer: _____ |

Study ID: \_\_\_\_\_

Visit Date: \_\_\_\_\_/\_\_\_\_\_/202\_\_\_\_

Visit No (check Box) 1  2  3  4  5  6 

Visit Start Time: \_\_\_\_:\_\_\_\_:\_\_\_\_ Visit End Time: \_\_\_\_:\_\_\_\_:\_\_\_\_

| Back of the Body |      |      |      |       |      |            |        |  |  |
|------------------|------|------|------|-------|------|------------|--------|--|--|
| Left             |      |      | C    | Right |      |            |        |  |  |
| BL               | BL   | HTJJ | GV   | HTJJ  | BL   | BL         |        |  |  |
|                  | BL10 |      |      |       | BL10 |            |        |  |  |
|                  | BL11 | T1   | GV14 | T1    | BL11 |            |        |  |  |
| BL41             | BL12 | T2   |      | T2    | BL12 | BL41       |        |  |  |
| BL42             | BL13 | T3   |      | T3    | BL13 | BL42       |        |  |  |
| BL43             | BL14 |      |      |       | BL14 | BL43       |        |  |  |
| BL44             | BL15 | T5   | GV11 | T5    | BL15 | BL44       |        |  |  |
| BL45             |      | T6   |      | T6    |      | BL45       |        |  |  |
| BL 46            | BL17 | T7   |      | T7    | BL17 | BL 46      |        |  |  |
| BL 47            | BL18 | T9   |      | T9    | BL18 | BL 47      |        |  |  |
| BL48             | BL19 | T10  |      | T10   | BL19 | BL48       |        |  |  |
| BL 49            | BL20 | T11  |      | T11   | BL20 | BL 49      |        |  |  |
| BL50             | BL21 | T12  |      | T12   | BL21 | BL 50      |        |  |  |
| Pi Gen           | BL51 | BL22 | L1   | L1    | BL22 | BL51       | Pi Gen |  |  |
| BL52             | BL23 | L2   | GV4  | L2    | BL23 | BL52       |        |  |  |
|                  | BL24 | L3   |      | L3    | BL24 |            |        |  |  |
| Yao Yan          | BL25 | L4   | GV3  | L4    | BL25 | Yao Yan    |        |  |  |
| Huan Zhong       |      |      |      |       |      | Huan Zhong |        |  |  |
|                  | BL26 | L5   | SQZX | L5    | BL26 |            |        |  |  |
| SI Joint         | BL27 |      |      |       | BL27 | SI Joint   |        |  |  |
| BL53             | BL28 |      |      |       | BL28 | BL53       |        |  |  |
|                  | BL29 |      |      |       | BL29 |            |        |  |  |
|                  | BL30 |      |      |       | BL30 |            |        |  |  |
| GB29             |      |      |      |       |      | Gb 29      |        |  |  |
| GB30             |      |      |      |       |      | Gb30       |        |  |  |
|                  | BL31 |      |      |       | BL31 |            |        |  |  |
|                  | BL32 |      |      |       | BL32 |            |        |  |  |
| BL54             | BL33 |      | GV2  |       | BL33 | BL54       |        |  |  |
|                  | BL34 |      |      |       | BL34 |            |        |  |  |
|                  | BL35 |      |      |       | BL35 |            |        |  |  |

| Left     |      | C         | Right |       |
|----------|------|-----------|-------|-------|
| Gb 20    |      | Head      |       | GB 20 |
| GB 21    |      |           |       | GB21  |
|          |      | Yin Tang  |       |       |
|          | LI4  | Hand      | LI4   |       |
| Anterior |      |           |       |       |
|          |      | CV        |       |       |
|          |      | 12        |       |       |
| GB26     | ST25 |           | St 25 | GB26  |
|          |      | 6         |       |       |
| GB27     |      | 4         |       | GB27  |
|          |      | 3         |       |       |
| Left Ear |      | Right Ear |       |       |
| Shen Men |      | Shen Men  |       |       |
| Back     |      | Back      |       |       |
| Hip      |      | Hip       |       |       |
| Leg      |      | Leg       |       |       |
| Knee     |      | Knee      |       |       |
| Ankle    |      | Ankle     |       |       |

| Back of the Legs |     |       |      |
|------------------|-----|-------|------|
| BL36             |     | BL36  |      |
| BL37             |     | BL37  |      |
| BL 38            |     | BL38  |      |
| BL 39            |     | BL 39 |      |
| BL 40            |     | BL 40 |      |
| BL 57            |     | BL 57 |      |
| BL58             |     | BL58  |      |
| BL 59            |     | BL 59 |      |
| BL 60            |     | BL 60 |      |
| BL<br>62         | SI3 | SI3   | BL62 |

| Front of the Legs and Feet |       |     |     |       |     |       |      |
|----------------------------|-------|-----|-----|-------|-----|-------|------|
| Left                       |       |     |     | Right |     |       |      |
| GB31                       |       |     |     |       |     |       | GB31 |
| GB34                       | ST36  |     |     |       |     | ST36  | GB34 |
|                            | ST37  |     |     |       |     | ST37  |      |
| GB37                       |       |     |     |       |     |       | GB37 |
| GV39                       |       |     |     |       |     |       | GB39 |
|                            |       | SP6 | KI7 | KI7   | SP6 |       |      |
| GB40                       |       | Sp5 | KI4 | KI4   | Sp5 |       | GB40 |
| TW5                        | GB41  |     | KI3 | KI3   |     | GB41  | TW5  |
|                            | Liv 3 | SP2 |     |       | SP2 | Liv 3 |      |

|                                 |
|---------------------------------|
| <b>Ashi (Location):</b>         |
| <b>Ashi (Location):</b>         |
| <b>Ashi (Location):</b>         |
| <b>Other _____ . Rationale:</b> |
| <b>Other _____ . Rationale:</b> |
| <b>Other _____ . Rationale:</b> |
